# Supplementary material
Source: PubMed Central journal article supplement (PMC5799084)
Supplement: NIHMS859422-supplement-4.pdf [file NIHMS859422-supplement-4.pdf]

## Supplementary Figure 2

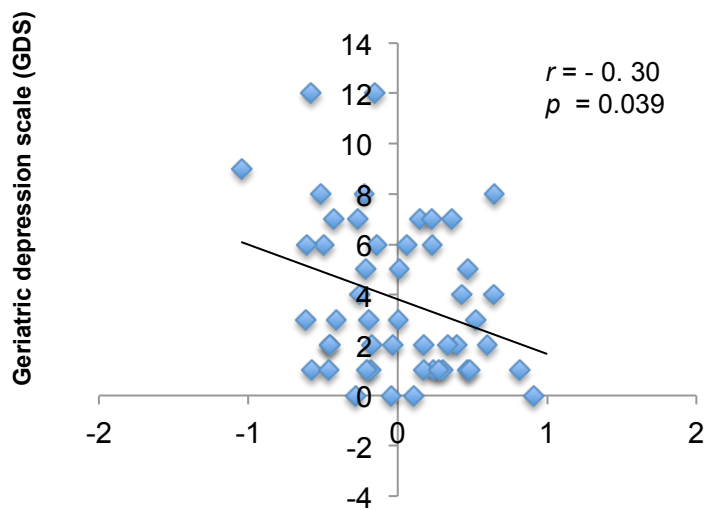

Functional connectivity values within Emotion network (NKI 6/Laird 1: see Figure 1D) after controlling for sex and ICV
