# Supplementary material
Source: PubMed Central journal article supplement (PMC5799084)

A) Cognition

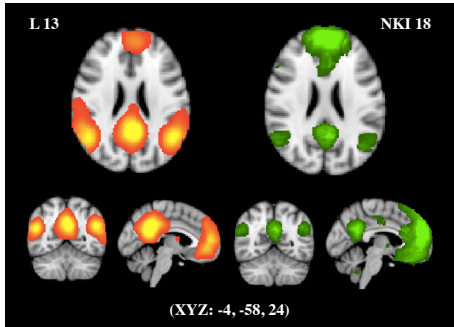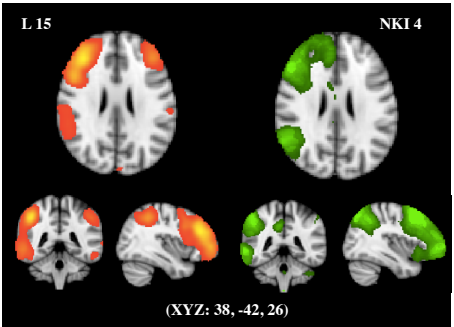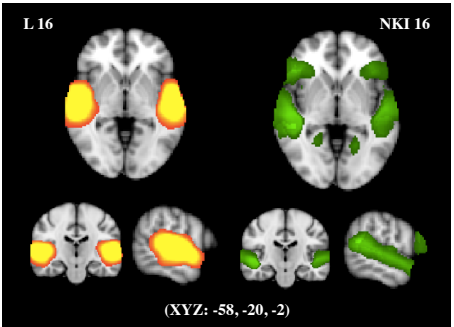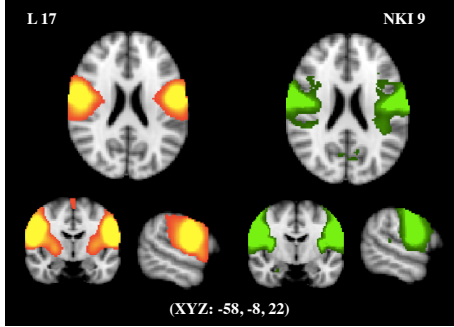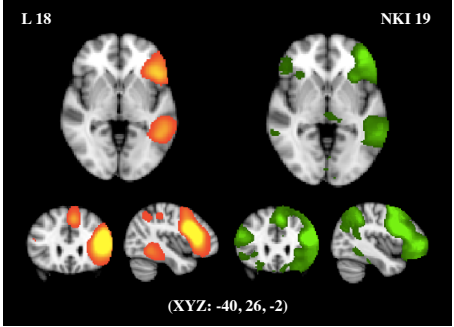

B) Motor/Visuospatial

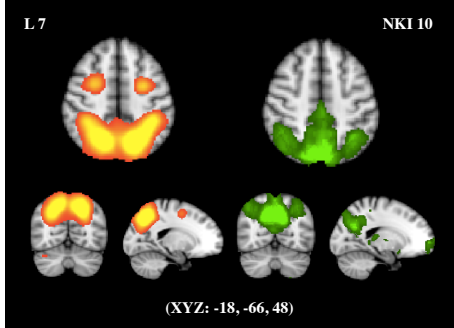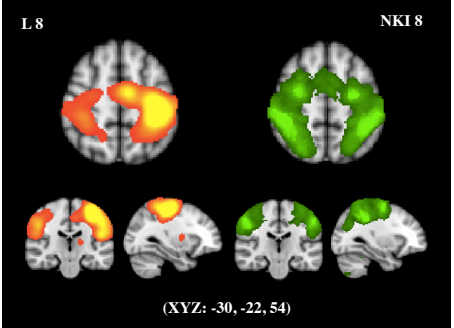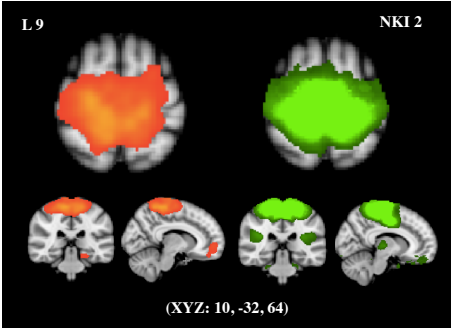

C) Vision

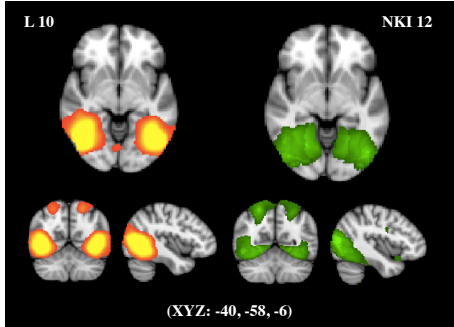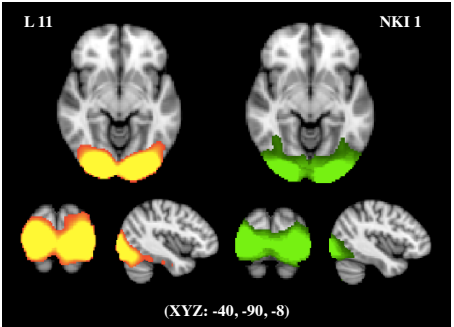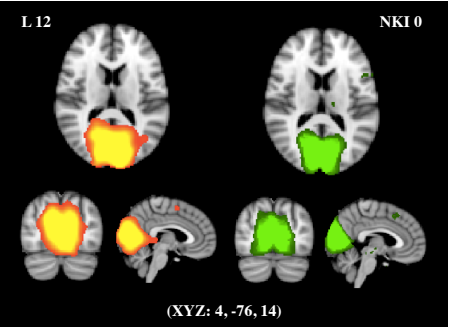

D) Emotion

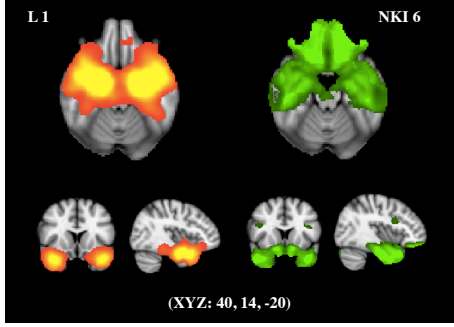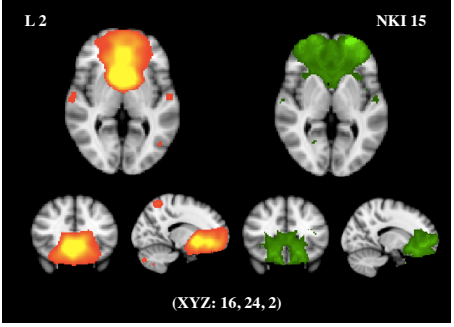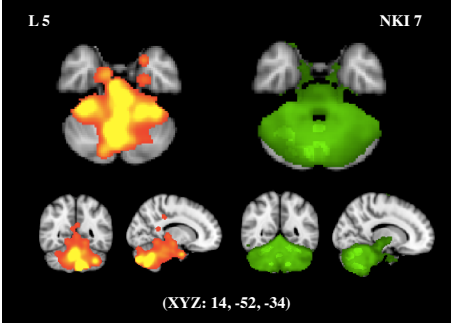

Supplement: NIHMS859422-supplement-1.pdf [file NIHMS859422-supplement-1.pdf]

## A) Cognition

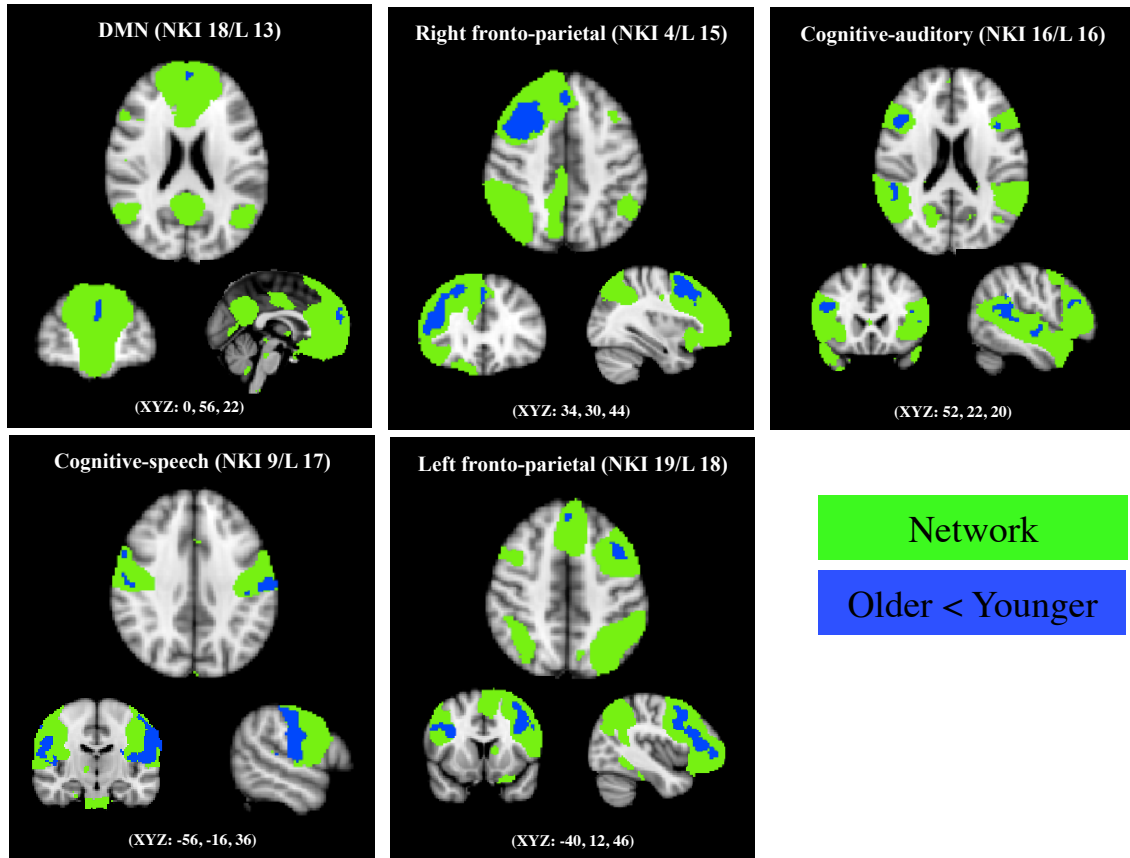

## B) Motor/Visuospatial

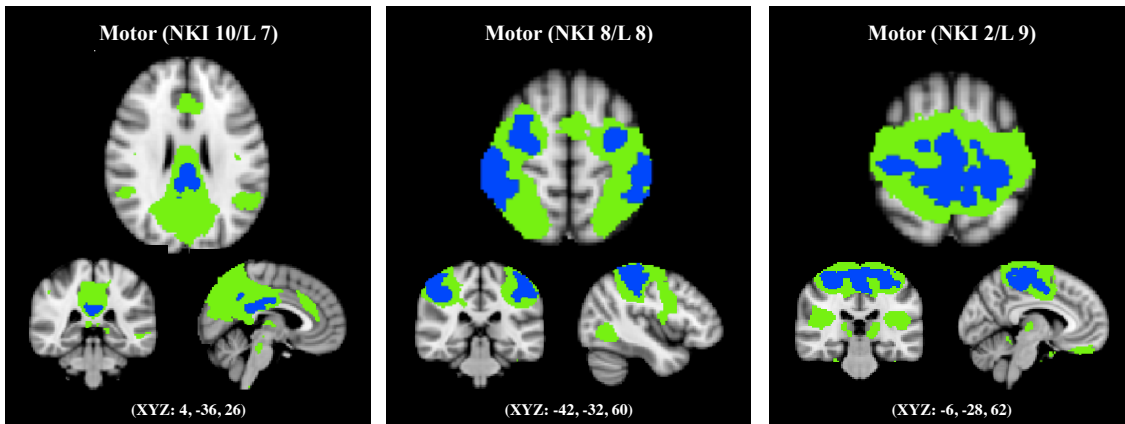

### C) Vision

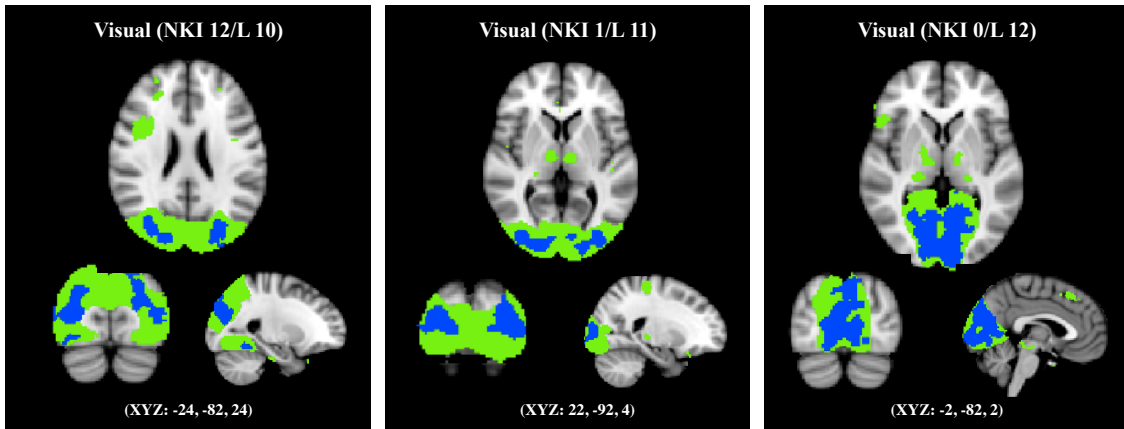

### D) Emotion

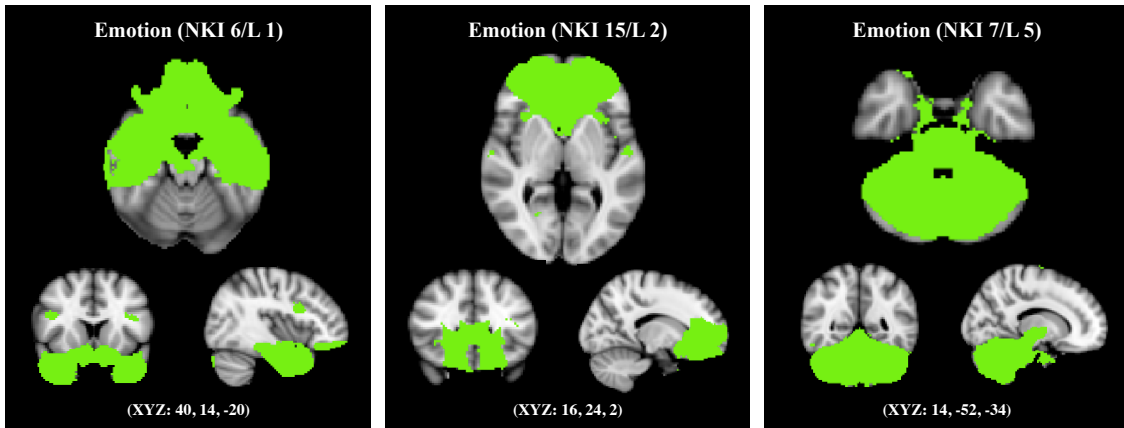

Supplement: NIHMS859422-supplement-2.pdf [file NIHMS859422-supplement-2.pdf]

Supplementary Figure 1

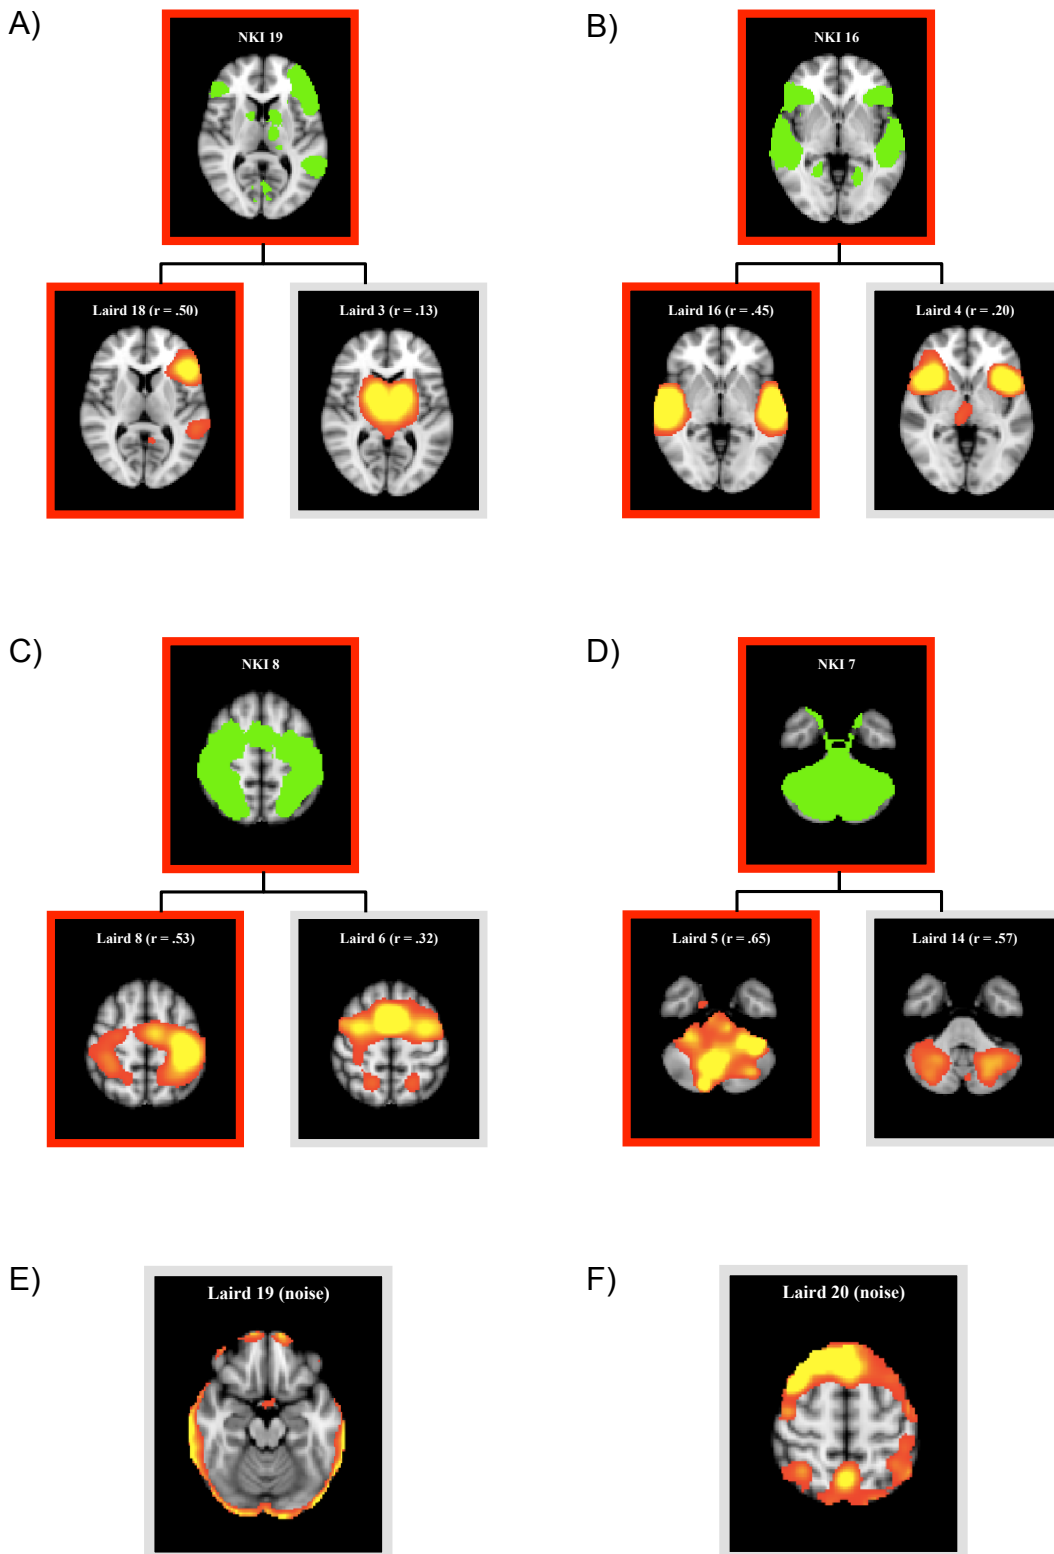

Supplement: NIHMS859422-supplement-3.pdf [file NIHMS859422-supplement-3.pdf]
